# Supplementary material for: Paper-Based Analytical Device for Zinc Ion Quantification in Water Samples with Power-Free Analyte Concentration
Source: MDPI journal article supplement (doi:10.3390/mi8040127), 2017-04-18
Supplement: s1 [file s1]

# Paper-Based Analytical Device for Zinc Ion Quantification in Water Samples with Power-Free Analyte Concentration

Hiroko Kudo, Kentaro Yamada, Daiki Watanabe, Koji Suzuki, and Daniel Citterio

**Table S1.** Material cost estimation for single 3D-PAD.

| Material                   | Cost Per Device |
|----------------------------|-----------------|
| GFDX203000 glass fiber     | \$0.133         |
| CF7 absorbent pad          | \$0.175         |
| GFCP103000 cellulose pad   | \$0.0583        |
| Whatman No. 1 filter paper | \$0.00983       |
| Zincon                     | \$0.00000644    |
| Salicylaldoxime            | \$0.000657      |
| TAPS                       | \$0.0116        |
| TMAOH                      | \$0.01016       |
| Copper (II) chloride       | \$0.000000125   |
| Total                      | \$0.398         |

**Table S2.** Material cost estimation for the 3D-printed device holder.

| Material                  | Cost Per Holder |
|---------------------------|-----------------|
| FullCure810 VeroClear     | \$9.70          |
| FullCure705 Resin Support | \$4.33          |
| Total                     | \$14.0          |

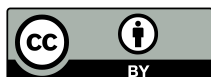

© 2017 by the authors; licensee MDPI, Basel, Switzerland. This article is an open access article distributed under the terms and conditions of the Creative Commons Attribution (CC BY) license (<http://creativecommons.org/licenses/by/4.0/>).
